# Supplementary material
Source: publisher figshare collection journal article supplement (https://acs.figshare.com/ndownloader/files/10914605)
Supplement: Supplementary file 1 [file 10914605]

**Establishment of novel biosynthetic pathways for the production of salicyl alcohol and  
gentisyl alcohol in engineered *Escherichia coli***

Xiaolin Shen<sup>a,b,1</sup>, Jia Wang<sup>a,b,1</sup>, Bradley K. Gall<sup>c</sup>, Eric M. Ferreira<sup>c</sup>,

Qipeng Yuan<sup>a,b,\*</sup>, Yajun Yan<sup>d,\*</sup>

**Supporting Information**

**Contents:**

Figure S1

Figure S2

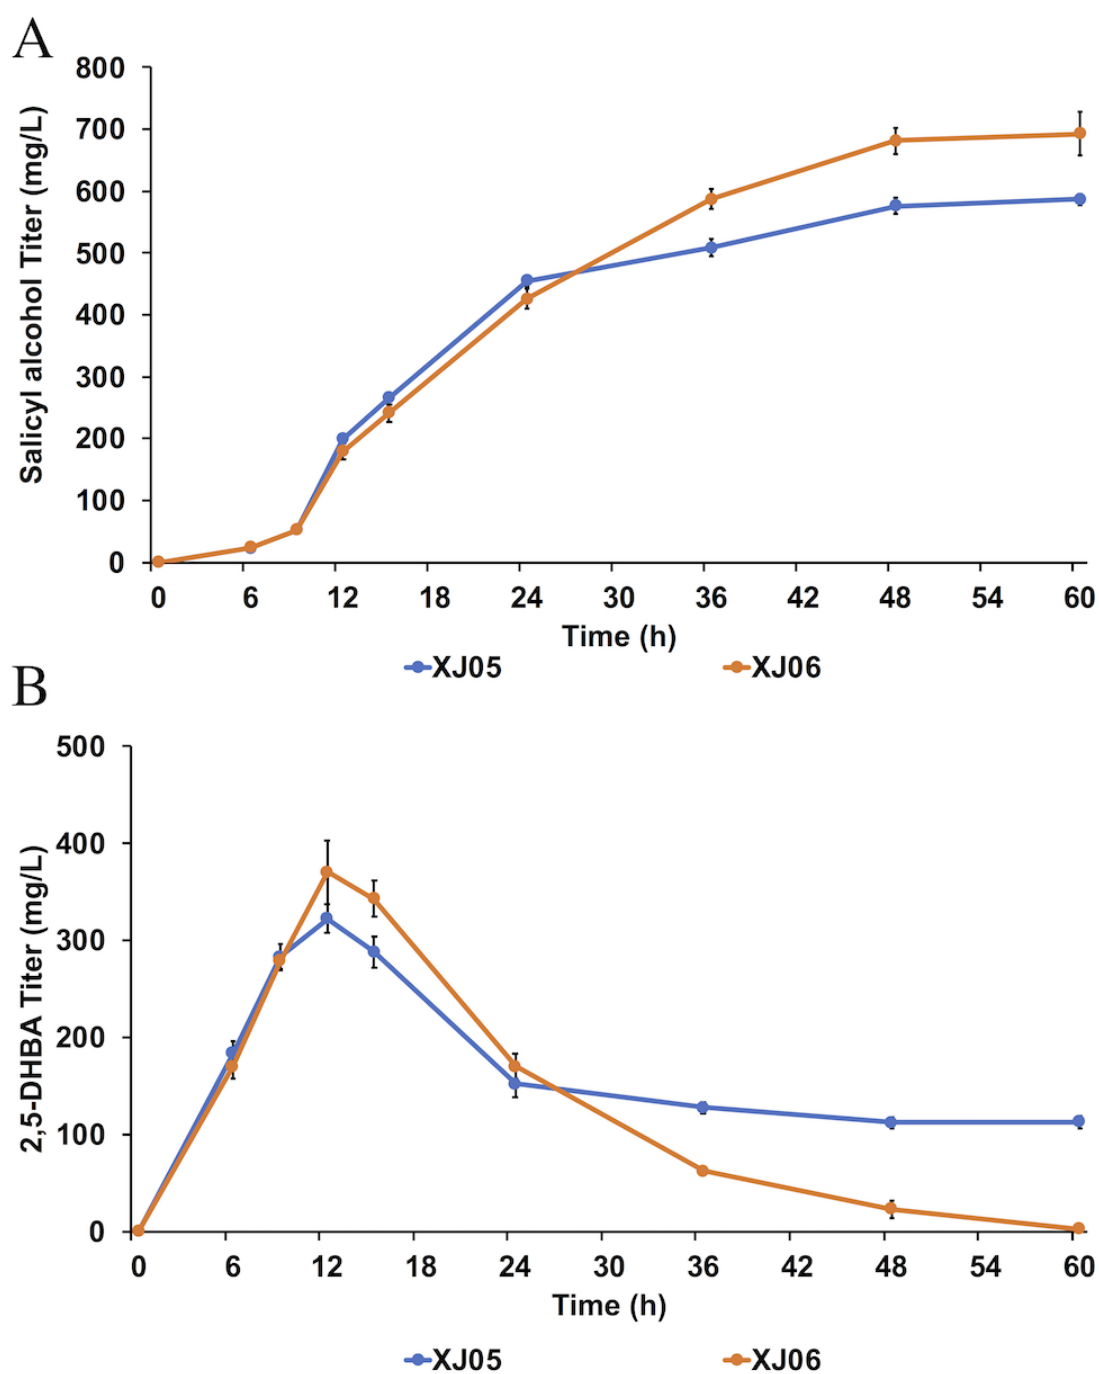

**Figure S1** Production profiles of the by-product salicyl alcohol and intermediate 2,5-DHBA in strains XJ05 and XJ06. (A) The production of the by-product salicyl alcohol; (B) The accumulation of the intermediate 2,5-DHBA. The data were generated from three independent experiments (n=3; s.d. represented by  $\pm$ ).

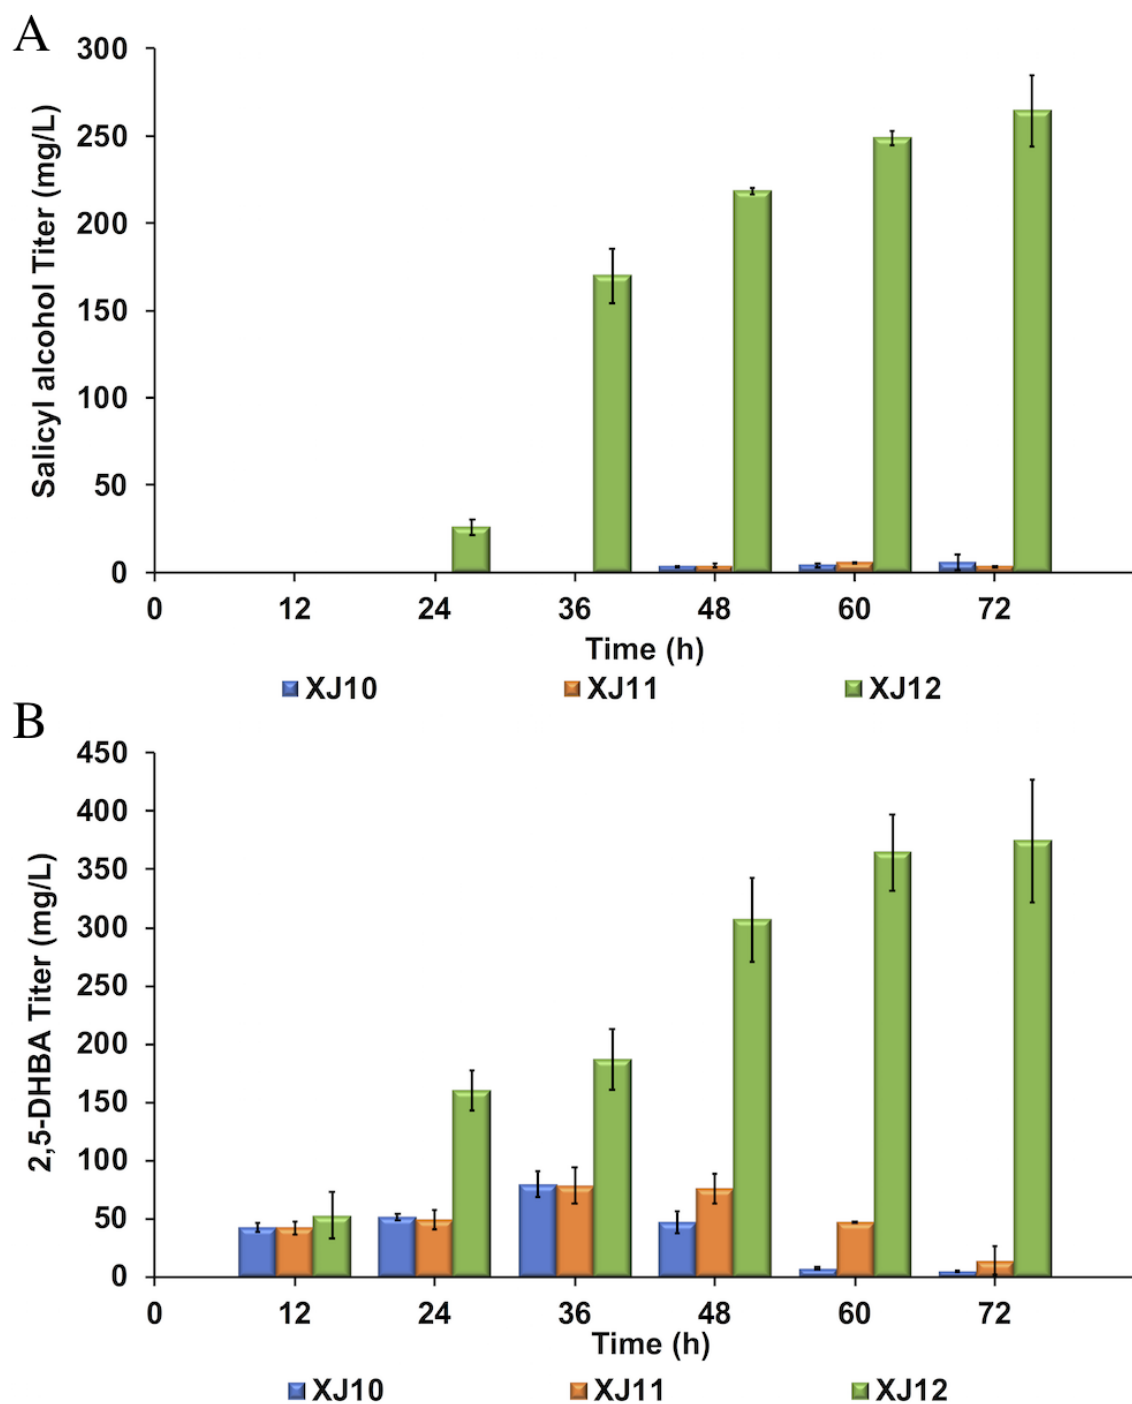

**Figure S2** Production profiles of the by-product salicyl alcohol and intermediate 2,5-DHBA in strains XJ10, XJ11 and XJ12. (A) The production of the by-product salicyl alcohol; (B) The accumulation of the intermediate 2,5-DHBA. The data were generated from three independent experiments (n=3; s.d. represented by  $\pm$ ).
